# Supplementary material for: A reverse-design-strategy for C@Li3VO4 nanoflakes toward superb high-rate Li-ion storage
Source: Royal Society of Chemistry journal article supplement (doi:10.1039/d1ta05662j), 2021-01-01
Supplement: d1ta05662j1.pdf [file d1ta05662j1.pdf]

## Reverse-design-strategy for C@Li<sub>3</sub>VO<sub>4</sub> Nanoflakes toward superb high-rate Li-ion storage

Jie Xu<sup>a</sup>, Pei Liang<sup>b</sup>, Dongmei Zhang<sup>a</sup>, Cunyuan Pei<sup>a</sup>, Zongping Zhang<sup>a</sup>, Shuyue Yang<sup>a</sup>,  
Shibing Ni<sup>a\*</sup>

<sup>a</sup>College of Materials and Chemical Engineering, Key Laboratory of Inorganic Nonmetallic Crystalline and Energy Conversion Materials, China Three Gorges University, Yichang, 443002, China. E-mail: shibingni07@126.com;

<sup>b</sup>College of Optical and Electronic Technology, China Jiliang University, 310018, Hangzhou, China.

**Keywords:** Lithium vanadate; Reaction kinetics; Anode; Lithium ion batteries

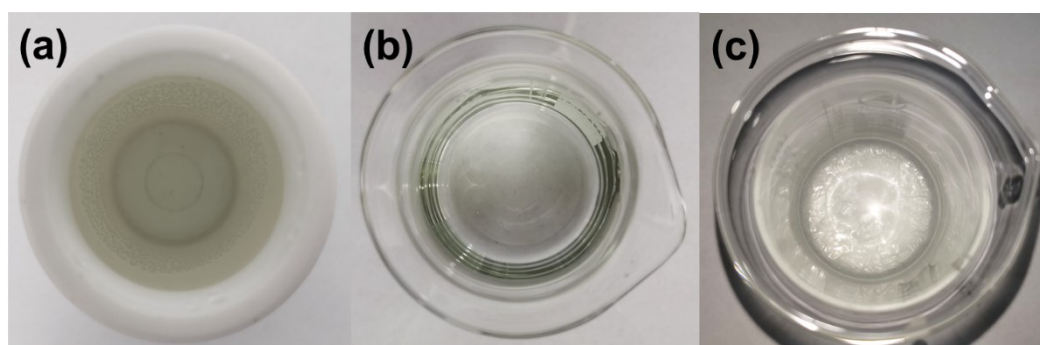

Fig. S1 Optical photograph of the LVO precursor. (a) Obtained via hydrothermal reaction. Transferred into a beaker before (b) and after (c) drying.

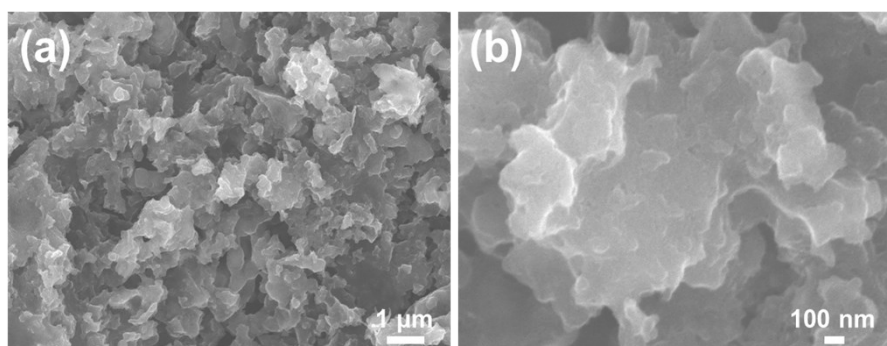

Fig. S2 SEM image of LVO@C with low (a) and high (b) magnification.

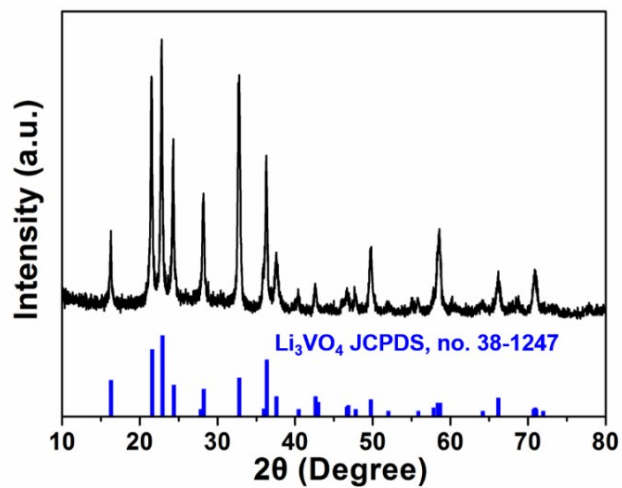

Fig. S3 XRD pattern of the LVO@C.

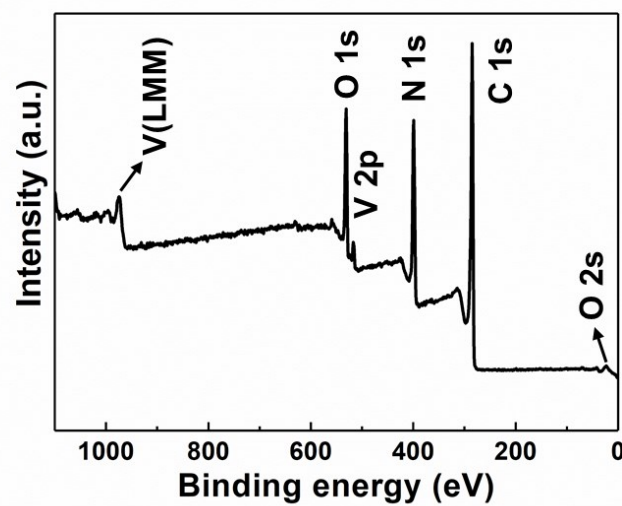

Fig. S4 Survey XPS spectrum of the as-prepared C@LVO-NFs.

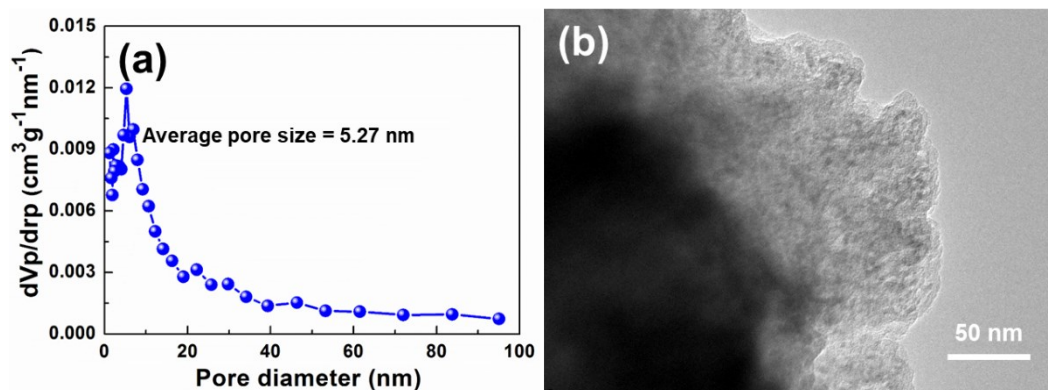

Fig. S5 (a) Pore size distribution curve and (b) TEM image of the C@LVO-NFs.

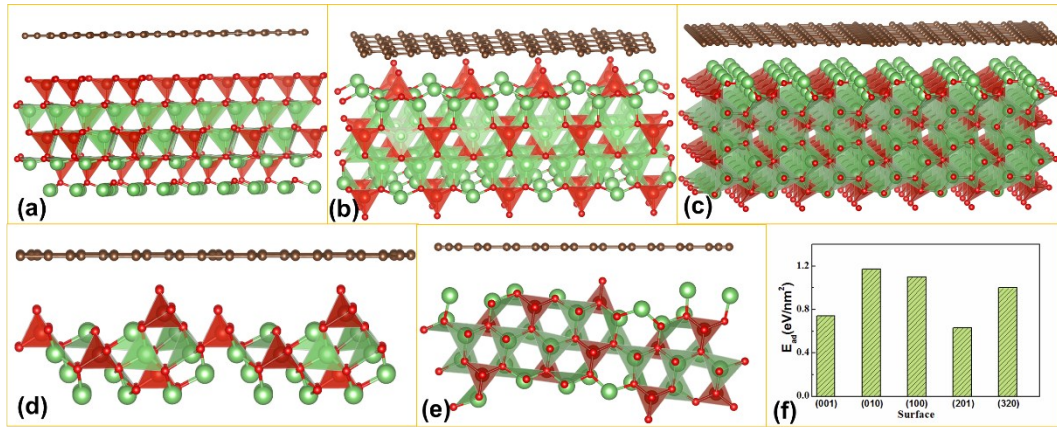

Fig. S6 The atomistic hybrid structure of C nanoflake and LVO surface. (a) The hybrid structure of C/LVO(001) surface; (b) The hybrid structure of C/LVO(010) surface; (c) The hybrid structure of C/LVO(100) surface; (d) The hybrid structure of C/LVO(201) surface; (e) The hybrid structure of C/LVO(320) surface; (f) The statistical data of the absorption energy of different hybrid structures.

Tab. S1 The calculated bandgap and D-value between LVO and the monolayer C.

| Different surface | Bandgap (eV) | D(LVO-C) (nm) |
|-------------------|--------------|---------------|
| 001               | 0.14         | 2.153         |
| 010               | 0.16         | 1.788         |
| 011               | 0.11         | 1.977         |
| 201               | 0.17         | 2.245         |
| 320               | 0.09         | 1.927         |

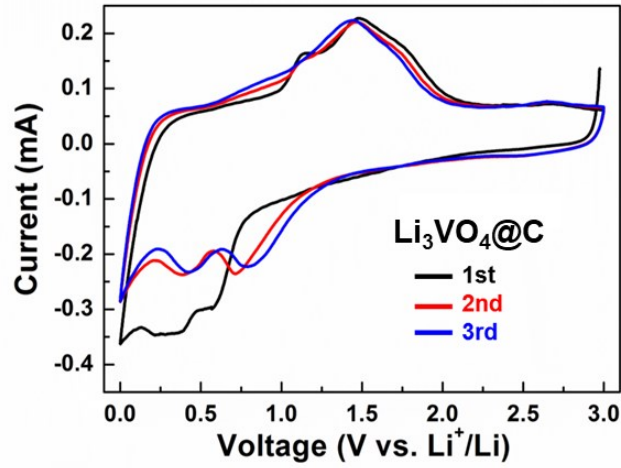

Fig. S7 CV curves of the LVO@C.

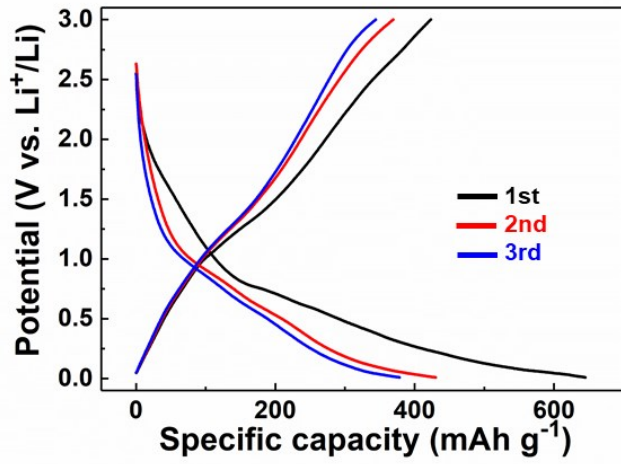

Fig. S8 The initial three charge/discharge curves of the LVO@C.

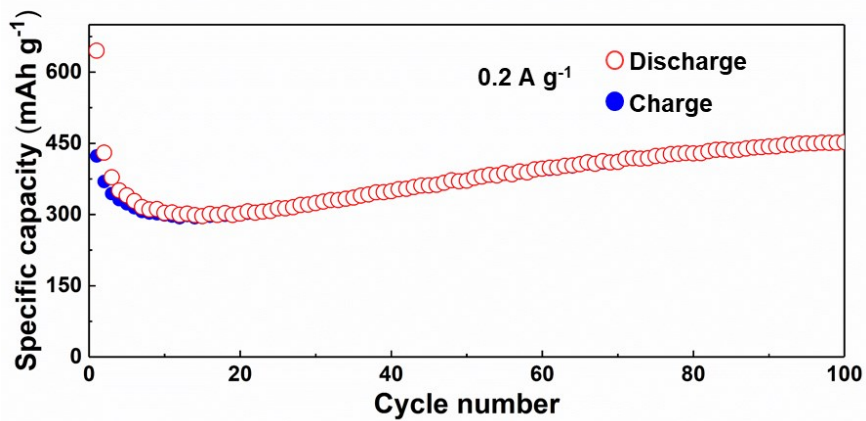

Fig. S9 Capacity retention of the LVO@C at 0.2 A g<sup>-1</sup>.

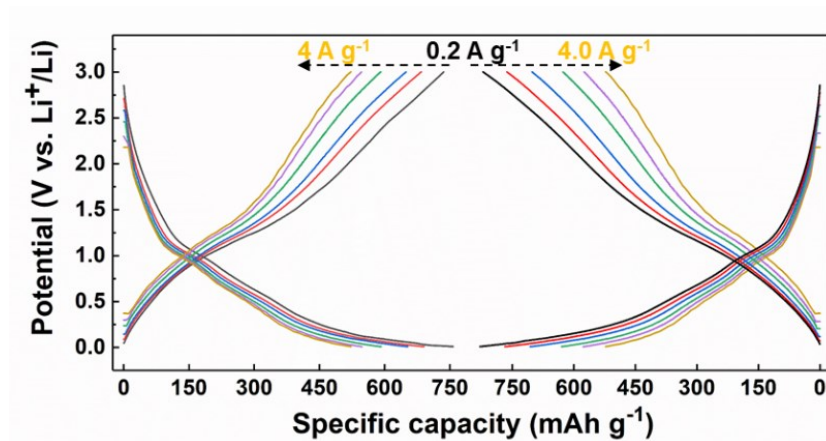

Fig. S10 Representative charge/discharge curves in the first period rate performance testing for Figure 4d.

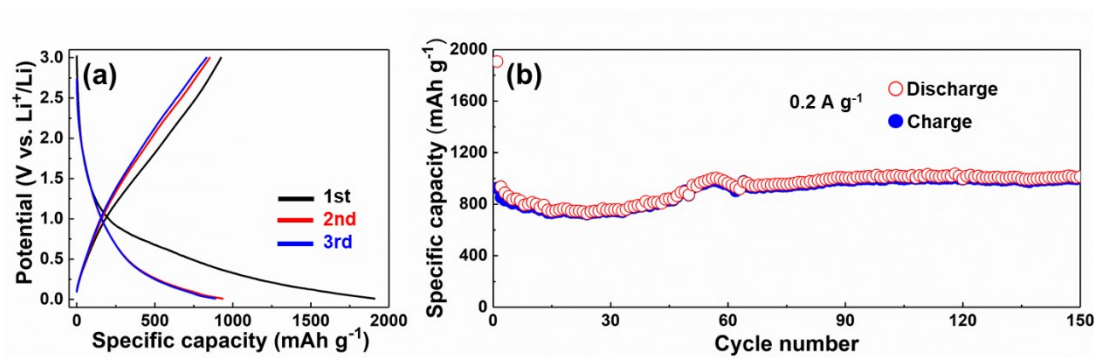

Fig. S11 The initial three charge/discharge curves (a) and cycle performance (b) of C obtained by fully etching C@LVO in diluted HCl and washed by deionized water.

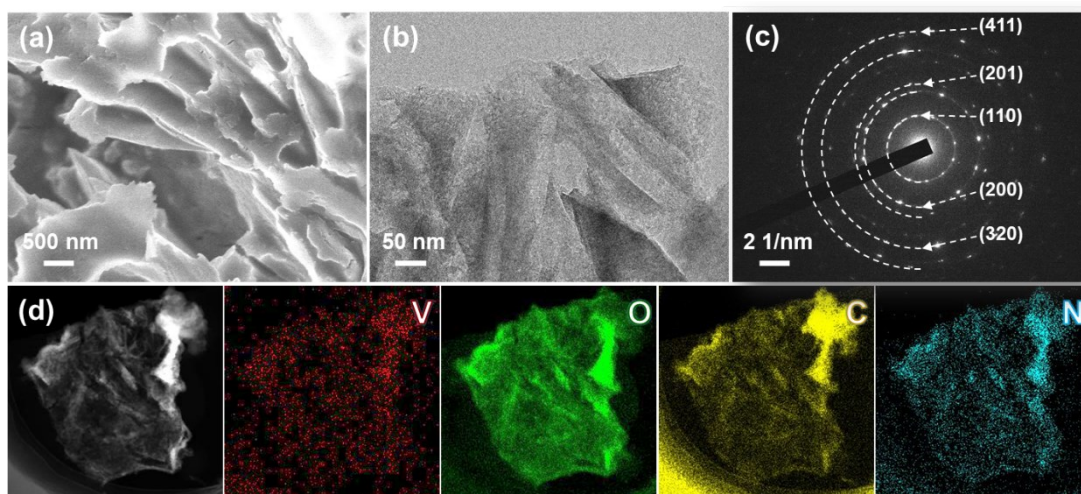

Fig. S12 Microstructure of the C@LVO-NFs after long-life testing. (a) SEM and (b) TEM image, (c) SAED pattern, and (d) scanning TEM image with element mappings of V, O, C and N.

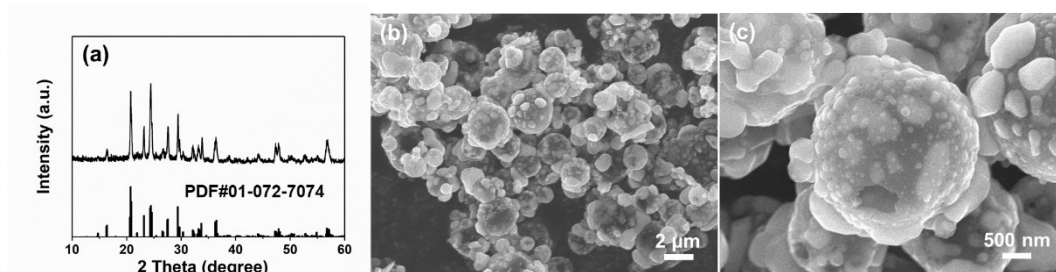

Fig. S13 XRD pattern (a) SEM images with low (b) and high (c) magnification of the as-prepared  $\text{Li}_3\text{V}_2(\text{PO}_4)_3$  cathode.

The  $\text{Li}_3\text{V}_2(\text{PO}_4)_3$  cathode (LVP) were prepared via hydrothermal reaction with spray drying. Firstly, 5 mmol hexamethylenetetramine, 2 mmol  $\text{V}_2\text{O}_5$ , 3.1 mmol  $\text{Li}_2\text{CO}_3$  and 0.7479 g  $\text{C}_6\text{H}_{12}\text{O}_6 \cdot \text{H}_2\text{O}$  were dissolved in deionized water and transferred into a 50 mL teflonlined autoclave, reacting at 120 °C for 12 h, to obtain an intermediate solution. Then, 0.6902 g  $\text{NH}_4\text{H}_2\text{PO}_4$  were added in the solution with stirring for 30 mins. Finally, the mixed solution was spray dried and collected, sintered at 350 °C for 4 h and then 850 °C for 8 h in  $\text{N}_2$ .

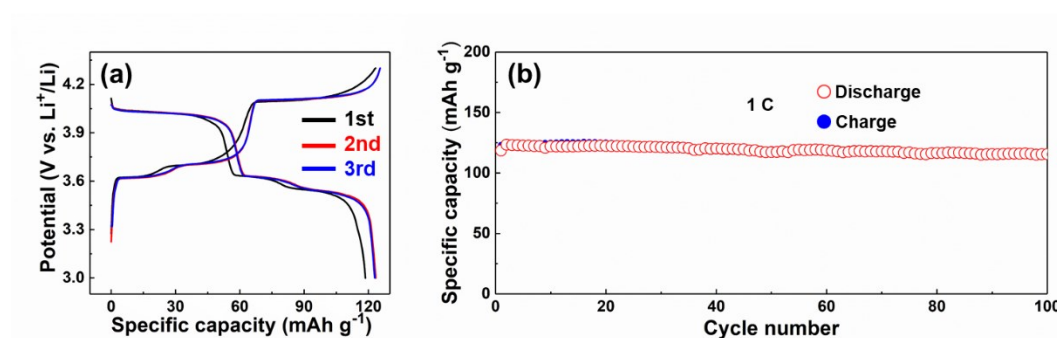

Fig. S14 The initial three charge/discharge curves (a) and cycle performance (b) of the LVP cathode.
